# Supplementary material
Source: MDPI journal article supplement (https://www.mdpi.com/2071-1050/10/6/2047)
Supplement: s1 [file s1]

## Sheet: MetaData
Raw Data for Langellotto et al. 2018, Garden Pollinators and Ecosystem Service Flow
Data Time Period
	Bees Collected in 2017, measured in 2018.
	Agricultural land calcuated in 2018, from 2017 USDA Cropland Data.
	Residential garden land calculated in 2018, from 2012-2013 groudtruthed Google Earth Pro data.
Data Entry and Management
	Bee Data: collected by G.A., I.M., L.C.; IT distance measured by I.M., L.C.
	Ag Data: generated by A.A., with input by G.L. and A.M.
	Garden Data: generated by A.A. with input by G.L., N.M.
Bee IT Data Workbook Sheet
	Specimen Number refers to the internal tracking number we use to identify individual specimens
	InterTegula (IT) width (mm) refers to the distance between forewing tegula
	log y for typical homing distance refers to the equation (1) from the manuscript, a + b log IT
	y (typical homing distance) km is the log of the value, above, giving typical homing distance (in km)
	Collection Date is the date specimens were collected in the garden (DD_MO_YEAR)
	Site Number refers to the number assigned to each garden study site
	City of garden study sites
	State of garden study sites (all OR)
	Country of garden study sites (all U.S.A.)
	County of garden study sites
	Collection Method for bee specimens, either hand-collected or pan trap
	PUBLIC latitude: is the lattitude of garden study sites, to three significant figures, to retain anonymity of these private sites
	PUBLIC longitude is the longitude of garden study sites, to three significant figures, to retain anonymity of these private sites
	Bee Taxa: is the identification of Apis mellifera and Bombus sp., only. All other bee specimens await final identification.

## Sheet: Bee IT Data
Specimen Number	InterTegula (IT) width (mm)	log y for typical homing distance	y (typical homing distance) km	Collection Date	Site Number	City	State	Country	County	Collection Method	PUBLIC latitude	PUBLIC longitude	Bee Taxa
293	1.35	2.7337	0.436751	29_6_2017	6	Portland	Oregon	USA	Multnomah	Hand collected	45.467	-122.69
301	1.5	3.22	0.507856	28_7_2017	6	Portland	Oregon	USA	Multnomah	Pan trap	45.467	-122.69
306	1.51	3.25242	0.512207	29_6_2017	6	Portland	Oregon	USA	Multnomah	Hand collected	45.467	-122.69
297	1.76	4.06292	0.608838	28_7_2017	6	Portland	Oregon	USA	Multnomah	Pan trap	45.467	-122.69
303	1.82	4.25744	0.629149	27_7_2017	6	Portland	Oregon	USA	Multnomah	Hand collected	45.467	-122.69
305	1.85	4.3547	0.638958	29_6_2017	6	Portland	Oregon	USA	Multnomah	Hand collected	45.467	-122.69
300	1.88	4.45196	0.648551	27_7_2017	6	Portland	Oregon	USA	Multnomah	Hand collected	45.467	-122.69
299	1.91	4.54922	0.657937	27_7_2017	6	Portland	Oregon	USA	Multnomah	Hand collected	45.467	-122.69
304	2.12	5.23004	0.718505	27_7_2017	6	Portland	Oregon	USA	Multnomah	Hand collected	45.467	-122.69
302	3.37	9.28254	0.967667	27_7_2017	6	Portland	Oregon	USA	Multnomah	Hand collected	45.467	-122.69	Apis mellifera
298	3.41	9.41222	0.973692	27_7_2017	6	Portland	Oregon	USA	Multnomah	Hand collected	45.467	-122.69
296	3.61	10.0606	1.00262	24_8_2017	6	Portland	Oregon	USA	Multnomah	Hand collected	45.467	-122.69	Apis mellifera
295	3.64	10.1579	1.0068	24_8_2017	6	Portland	Oregon	USA	Multnomah	Pan trap	45.467	-122.69	Apis mellifera
294	3.77	10.5793	1.02446	26_8_2017	6	Portland	Oregon	USA	Multnomah	Pan trap	45.467	-122.69	Apis mellifera
292	4.53	13.0433	1.11539	26_8_2017	6	Portland	Oregon	USA	Multnomah	Pan trap	45.467	-122.69
291	4.61	13.3026	1.12394	26_8_2017	6	Portland	Oregon	USA	Multnomah	Pan trap	45.467	-122.69
516	0.99	1.56658	0.194953	21_6_2017	9	West Linn	Oregon	USA	Clackamas	Pan trap	45.378	-122.66
117	1.09	1.89078	0.276641	26_7_2017	9	West Linn	Oregon	USA	Clackamas	Pan trap	45.378	-122.66
510	1.16	2.11772	0.325869	21_6_2017	9	West Linn	Oregon	USA	Clackamas	Pan trap	45.378	-122.66
122	1.17	2.15014	0.332467	26_7_2017	9	West Linn	Oregon	USA	Clackamas	Pan trap	45.378	-122.66
125	1.17	2.15014	0.332467	26_7_2017	9	West Linn	Oregon	USA	Clackamas	Pan trap	45.378	-122.66
126	1.17	2.15014	0.332467	26_7_2017	9	West Linn	Oregon	USA	Clackamas	Pan trap	45.378	-122.66
509	1.3	2.5716	0.410203	21_6_2017	9	West Linn	Oregon	USA	Clackamas	Pan trap	45.378	-122.66
512	1.32	2.63644	0.421018	24_8_2017	9	West Linn	Oregon	USA	Clackamas	Hand collected	45.378	-122.66
121	1.33	2.66886	0.426326	26_7_2017	9	West Linn	Oregon	USA	Clackamas	Pan trap	45.378	-122.66
511	1.37	2.79854	0.446932	24_8_2017	9	West Linn	Oregon	USA	Clackamas	Hand collected	45.378	-122.66
515	1.37	2.79854	0.446932	24_8_2017	9	West Linn	Oregon	USA	Clackamas	Hand collected	45.378	-122.66
119	1.41	2.92822	0.466604	26_7_2017	9	West Linn	Oregon	USA	Clackamas	Pan trap	45.378	-122.66
527	1.41	2.92822	0.466604	26_8_2017	9	West Linn	Oregon	USA	Clackamas	Pan trap	45.378	-122.66
520	1.42	2.96064	0.471386	26_8_2017	9	West Linn	Oregon	USA	Clackamas	Pan trap	45.378	-122.66
499	1.44	3.02548	0.480794	20_6_2017	9	West Linn	Oregon	USA	Clackamas	Hand collected	45.378	-122.66
493	1.46	3.09032	0.490003	20_6_2017	9	West Linn	Oregon	USA	Clackamas	Hand collected	45.378	-122.66
513	1.46	3.09032	0.490003	24_8_2017	9	West Linn	Oregon	USA	Clackamas	Hand collected	45.378	-122.66
116	1.48	3.15516	0.499021	26_7_2017	9	West Linn	Oregon	USA	Clackamas	Pan trap	45.378	-122.66
491	1.6	3.5442	0.549518	24_8_2017	9	West Linn	Oregon	USA	Clackamas	Hand collected	45.378	-122.66
505	1.6	3.5442	0.549518	21_6_2017	9	West Linn	Oregon	USA	Clackamas	Pan trap	45.378	-122.66
514	1.63	3.64146	0.561276	24_8_2017	9	West Linn	Oregon	USA	Clackamas	Hand collected	45.378	-122.66
519	1.67	3.77114	0.576473	26_8_2017	9	West Linn	Oregon	USA	Clackamas	Pan trap	45.378	-122.66
504	1.68	3.80356	0.58019	21_6_2017	9	West Linn	Oregon	USA	Clackamas	Pan trap	45.378	-122.66
528	1.69	3.83598	0.583876	26_8_2017	9	West Linn	Oregon	USA	Clackamas	Pan trap	45.378	-122.66
500	1.73	3.96566	0.598315	20_6_2017	9	West Linn	Oregon	USA	Clackamas	Hand collected	45.378	-122.66
118	1.78	4.12776	0.615714	26_7_2017	9	West Linn	Oregon	USA	Clackamas	Pan trap	45.378	-122.66
524	1.83	4.28986	0.632443	24_8_2017	9	West Linn	Oregon	USA	Clackamas	Hand collected	45.378	-122.66
530	1.97	4.74374	0.676121	26_8_2017	9	West Linn	Oregon	USA	Clackamas	Pan trap	45.378	-122.66
506	2.06	5.03552	0.702044	20_6_2017	9	West Linn	Oregon	USA	Clackamas	Hand collected	45.378	-122.66
531	2.15	5.3273	0.726507	26_8_2017	9	West Linn	Oregon	USA	Clackamas	Pan trap	45.378	-122.66
529	2.29	5.78118	0.762016	26_8_2017	9	West Linn	Oregon	USA	Clackamas	Pan trap	45.378	-122.66
525	2.31	5.84602	0.76686	26_8_2017	9	West Linn	Oregon	USA	Clackamas	Pan trap	45.378	-122.66
526	2.37	6.04054	0.781076	26_8_2017	9	West Linn	Oregon	USA	Clackamas	Pan trap	45.378	-122.66
115	2.61	6.81862	0.833696	26_7_2017	9	West Linn	Oregon	USA	Clackamas	Pan trap	45.378	-122.66
114	2.65	6.9483	0.841879	26_7_2017	9	West Linn	Oregon	USA	Clackamas	Pan trap	45.378	-122.66
521	3.13	8.50446	0.929647	24_8_2017	9	West Linn	Oregon	USA	Clackamas	Hand collected	45.378	-122.66
501	3.41	9.41222	0.973692	20_6_2017	9	West Linn	Oregon	USA	Clackamas	Hand collected	45.378	-122.66	Apis mellifera
507	3.57	9.93094	0.99699	20_6_2017	9	West Linn	Oregon	USA	Clackamas	Hand collected	45.378	-122.66	Apis mellifera
113	3.6	10.0282	1.00122	26_7_2017	9	West Linn	Oregon	USA	Clackamas	Pan trap	45.378	-122.66	Bombus sp.
502	3.61	10.0606	1.00262	20_6_2017	9	West Linn	Oregon	USA	Clackamas	Hand collected	45.378	-122.66	Apis mellifera
503	3.61	10.0606	1.00262	20_6_2017	9	West Linn	Oregon	USA	Clackamas	Hand collected	45.378	-122.66	Apis mellifera
508	3.64	10.1579	1.0068	20_6_2017	9	West Linn	Oregon	USA	Clackamas	Hand collected	45.378	-122.66	Apis mellifera
492	3.72	10.4172	1.01775	20_6_2017	9	West Linn	Oregon	USA	Clackamas	Hand collected	45.378	-122.66	Apis mellifera
497	3.89	10.9684	1.04014	20_6_2017	9	West Linn	Oregon	USA	Clackamas	Hand collected	45.378	-122.66	Bombus sp.
522	3.95	11.1629	1.04778	24_8_2017	9	West Linn	Oregon	USA	Clackamas	Hand collected	45.378	-122.66
494	4.1	11.6492	1.0663	20_6_2017	9	West Linn	Oregon	USA	Clackamas	Hand collected	45.378	-122.66	Bombus sp.
517	4.33	12.3949	1.09324	24_6_2017	9	West Linn	Oregon	USA	Clackamas	Hand collected	45.378	-122.66	Bombus sp.
518	4.55	13.1081	1.11754	24_6_2017	9	West Linn	Oregon	USA	Clackamas	Hand collected	45.378	-122.66	Bombus sp.
498	4.56	13.1405	1.11861	20_6_2017	9	West Linn	Oregon	USA	Clackamas	Hand collected	45.378	-122.66
495	4.6	13.2702	1.12288	20_6_2017	9	West Linn	Oregon	USA	Clackamas	Hand collected	45.378	-122.66	Bombus sp.
496	4.78	13.8538	1.14157	20_6_2017	9	West Linn	Oregon	USA	Clackamas	Hand collected	45.378	-122.66	Bombus sp.
110	1	1.599	0.203848	29_6_2017	20	Portland	Oregon	USA	Multnomah	Pan trap	45.587	-122.747
106	1.31	2.60402	0.415644	28_7_2017	20	Portland	Oregon	USA	Multnomah	Pan trap	45.587	-122.747
109	1.31	2.60402	0.415644	29_6_2017	20	Portland	Oregon	USA	Multnomah	Pan trap	45.587	-122.747
801	1.37	2.79854	0.446932	23_8_2017	20	Portland	Oregon	USA	Multnomah	Pan trap	45.587	-122.747
97	1.44	3.02548	0.480794	29_6_2017	20	Portland	Oregon	USA	Multnomah	Hand collected	45.587	-122.747
107	1.49	3.18758	0.503461	29_6_2017	20	Portland	Oregon	USA	Multnomah	Pan trap	45.587	-122.747
96	1.53	3.31726	0.52078	29_6_2017	20	Portland	Oregon	USA	Multnomah	Hand collected	45.587	-122.747
102	1.6	3.5442	0.549518	29_6_2017	20	Portland	Oregon	USA	Multnomah	Hand collected	45.587	-122.747
108	1.65	3.7063	0.568941	29_6_2017	20	Portland	Oregon	USA	Multnomah	Pan trap	45.587	-122.747
810	1.65	3.7063	0.568941	23_8_2017	20	Portland	Oregon	USA	Multnomah	Pan Trap	45.587	-122.747
105	1.67	3.77114	0.576473	28_7_2017	20	Portland	Oregon	USA	Multnomah	Pan trap	45.587	-122.747
802	1.74	3.99808	0.601851	23_8_2017	20	Portland	Oregon	USA	Multnomah	Pan trap	45.587	-122.747
812	1.87	4.41954	0.645377	23_8_2017	20	Portland	Oregon	USA	Multnomah	Pan Trap	45.587	-122.747
101	2.88	7.69396	0.88615	27_7_2017	20	Portland	Oregon	USA	Multnomah	Hand collected	45.587	-122.747
103	3.34	9.18528	0.963092	22_8_2017	20	Portland	Oregon	USA	Multnomah	Hand collected	45.587	-122.747
98	3.52	9.76884	0.989843	27_7_2017	20	Portland	Oregon	USA	Multnomah	Hand collected	45.587	-122.747
99	3.79	10.6442	1.02711	27_7_2017	20	Portland	Oregon	USA	Multnomah	Hand collected	45.587	-122.747	Bombus sp.
104	3.86	10.8711	1.03627	28_7_2017	20	Portland	Oregon	USA	Multnomah	Pan trap	45.587	-122.747	Apis mellifera
100	3.92	11.0656	1.04398	27_7_2017	20	Portland	Oregon	USA	Multnomah	Hand collected	45.587	-122.747	Apis mellifera
112	4.16	11.8437	1.07349	22_8_2017	20	Portland	Oregon	USA	Multnomah	Hand collected	45.587	-122.747	Bombus sp.
111	4.27	12.2003	1.08637	22_8_2017	20	Portland	Oregon	USA	Multnomah	Hand collected	45.587	-122.747	Bombus sp.
800	6.27	18.6843	1.27148	23_8_2017	20	Portland	Oregon	USA	Multnomah	Pan trap	45.587	-122.747	Bombus sp.
275	1.21	2.27982	0.357901	27_7_2017	22	Portland	Oregon	USA	Multnomah	Hand collected	45.496	-122.718
270	1.28	2.50676	0.399113	29_6_2017	22	Portland	Oregon	USA	Multnomah	Pan trap	45.496	-122.718
273	1.33	2.66886	0.426326	29_6_2017	22	Portland	Oregon	USA	Multnomah	Hand collected	45.496	-122.718
284	1.42	2.96064	0.471386	28_7_2017	22	Portland	Oregon	USA	Multnomah	Pan trap	45.496	-122.718
282	1.53	3.31726	0.52078	28_7_2017	22	Portland	Oregon	USA	Multnomah	Pan trap	45.496	-122.718
281	1.58	3.47936	0.541499	28_7_2017	22	Portland	Oregon	USA	Multnomah	Pan trap	45.496	-122.718
269	1.6	3.5442	0.549518	27_7_2017	22	Portland	Oregon	USA	Multnomah	Hand collected	45.496	-122.718
283	1.6	3.5442	0.549518	28_7_2017	22	Portland	Oregon	USA	Multnomah	Pan trap	45.496	-122.718
279	1.67	3.77114	0.576473	28_7_2017	22	Portland	Oregon	USA	Multnomah	Pan trap	45.496	-122.718
290	1.67	3.77114	0.576473	29_6_2017	22	Portland	Oregon	USA	Multnomah	Pan trap	45.496	-122.718
274	1.69	3.83598	0.583876	27_7_2017	22	Portland	Oregon	USA	Multnomah	Hand collected	45.496	-122.718
280	1.74	3.99808	0.601851	28_7_2017	22	Portland	Oregon	USA	Multnomah	Pan trap	45.496	-122.718
272	2.01	4.87342	0.687834	22_8_2017	22	Portland	Oregon	USA	Multnomah	Hand collected	45.496	-122.718
276	2.2	5.4894	0.739525	27_7_2017	22	Portland	Oregon	USA	Multnomah	Hand collected	45.496	-122.718
286	3.28	8.99076	0.953796	28_7_2017	22	Portland	Oregon	USA	Multnomah	Pan trap	45.496	-122.718
277	3.57	9.93094	0.99699	27_7_2017	22	Portland	Oregon	USA	Multnomah	Hand collected	45.496	-122.718	Apis mellifera
271	3.66	10.2227	1.00957	29_6_2017	22	Portland	Oregon	USA	Multnomah	Pan trap	45.496	-122.718	Apis mellifera
288	3.74	10.4821	1.02045	28_7_2017	22	Portland	Oregon	USA	Multnomah	Pan trap	45.496	-122.718	Apis mellifera
278	3.78	10.6118	1.02579	27_7_2017	22	Portland	Oregon	USA	Multnomah	Hand collected	45.496	-122.718	Bombus sp.
289	3.8	10.6766	1.02843	28_7_2017	22	Portland	Oregon	USA	Multnomah	Pan trap	45.496	-122.718	Apis mellifera
287	3.82	10.7414	1.03106	28_7_2017	22	Portland	Oregon	USA	Multnomah	Pan trap	45.496	-122.718	Apis mellifera
80	1.19	2.21498	0.34537	22_8_2017	35	Portland	Oregon	USA	Multnomah	Hand collected	45.502	-122.616
87	1.71	3.90082	0.591156	22_8_2017	35	Portland	Oregon	USA	Multnomah	Hand collected	45.502	-122.616
86	1.73	3.96566	0.598315	22_8_2017	35	Portland	Oregon	USA	Multnomah	Hand collected	45.502	-122.616
85	1.81	4.22502	0.625829	22_8_2017	35	Portland	Oregon	USA	Multnomah	Hand collected	45.502	-122.616
84	2.1	5.1652	0.713087	22_8_2017	35	Portland	Oregon	USA	Multnomah	Hand collected	45.502	-122.616
82	3.16	8.60172	0.934585	22_8_2017	35	Portland	Oregon	USA	Multnomah	Hand collected	45.502	-122.616
78	3.61	10.0606	1.00262	20_6_2017	35	Portland	Oregon	USA	Multnomah	Hand collected	45.502	-122.616	Apis mellifera
83	3.68	10.2876	1.01231	22_8_2017	35	Portland	Oregon	USA	Multnomah	Hand collected	45.502	-122.616	Apis mellifera
79	3.77	10.5793	1.02446	20_6_2017	35	Portland	Oregon	USA	Multnomah	Hand collected	45.502	-122.616	Apis mellifera
76	3.86	10.8711	1.03627	20_6_2017	35	Portland	Oregon	USA	Multnomah	Hand collected	45.502	-122.616
81	3.89	10.9684	1.04014	22_8_2017	35	Portland	Oregon	USA	Multnomah	Hand collected	45.502	-122.616	Apis mellifera
77	4.96	14.4373	1.15949	20_6_2017	35	Portland	Oregon	USA	Multnomah	Hand collected	45.502	-122.616	Bombus sp.
664	1.44	3.02548	0.480794	26_7_2017	38	Canby	Oregon	USA	Clackamas	Pan trap	45.281	-122.685
653	1.46	3.09032	0.490003	26_7_2017	38	Canby	Oregon	USA	Clackamas	Pan trap	45.281	-122.685
682	1.62	3.60904	0.557392	26_8_2017	38	Canby	Oregon	USA	Clackamas	Pan trap	45.281	-122.685
658	1.68	3.80356	0.58019	26_7_2017	38	Canby	Oregon	USA	Clackamas	Pan trap	45.281	-122.685
669	1.94	4.64648	0.667124	26_7_2017	38	Canby	Oregon	USA	Clackamas	Pan trap	45.281	-122.685
663	2.45	6.2999	0.799334	26_7_2017	38	Canby	Oregon	USA	Clackamas	Pan trap	45.281	-122.685
647	2.61	6.81862	0.833696	20_6_2017	38	Canby	Oregon	USA	Clackamas	Hand collected	45.281	-122.685
650	2.7	7.1104	0.851894	20_6_2017	38	Canby	Oregon	USA	Clackamas	Hand collected	45.281	-122.685
655	3.05	8.2451	0.916196	20_6_2017	38	Canby	Oregon	USA	Clackamas	Hand collected	45.281	-122.685
656	3.28	8.99076	0.953796	20_6_2017	38	Canby	Oregon	USA	Clackamas	Hand collected	45.281	-122.685
667	3.32	9.12044	0.960016	24_8_2017	38	Canby	Oregon	USA	Clackamas	Hand collected	45.281	-122.685	Apis mellifera
649	3.51	9.73642	0.988399	20_6_2017	38	Canby	Oregon	USA	Clackamas	Hand collected	45.281	-122.685	Apis mellifera
652	3.54	9.83368	0.992716	20_6_2017	38	Canby	Oregon	USA	Clackamas	Hand collected	45.281	-122.685
660	3.57	9.93094	0.99699	20_6_2017	38	Canby	Oregon	USA	Clackamas	Hand collected	45.281	-122.685	Bombus sp.
648	3.66	10.2227	1.00957	20_6_2017	38	Canby	Oregon	USA	Clackamas	Hand collected	45.281	-122.685	Apis mellifera
679	3.7	10.3524	1.01504	26_8_2017	38	Canby	Oregon	USA	Clackamas	Pan trap	45.281	-122.685	Bombus sp.
657	3.74	10.4821	1.02045	26_7_2017	38	Canby	Oregon	USA	Clackamas	Pan trap	45.281	-122.685	Apis mellifera
651	3.78	10.6118	1.02579	20_6_2017	38	Canby	Oregon	USA	Clackamas	Hand collected	45.281	-122.685	Apis mellifera
654	3.78	10.6118	1.02579	20_6_2017	38	Canby	Oregon	USA	Clackamas	Hand collected	45.281	-122.685
665	3.78	10.6118	1.02579	24_8_2017	38	Canby	Oregon	USA	Clackamas	Hand collected	45.281	-122.685
681	3.84	10.8063	1.03368	26_8_2017	38	Canby	Oregon	USA	Clackamas	Pan trap	45.281	-122.685	Apis mellifera
680	4.05	11.4871	1.06021	26_8_2017	38	Canby	Oregon	USA	Clackamas	Pan trap	45.281	-122.685	Bombus sp.
678	4.37	12.5245	1.09776	27_8_2017	38	Canby	Oregon	USA	Clackamas	Hand collected	45.281	-122.685	Bombus sp.
668	4.5	12.946	1.11214	24_8_2017	38	Canby	Oregon	USA	Clackamas	Hand collected	45.281	-122.685	Bombus sp.
659	4.75	13.7565	1.13851	20_6_2017	38	Canby	Oregon	USA	Clackamas	Hand collected	45.281	-122.685	Bombus sp.
666	5.99	17.7766	1.24985	24_8_2017	38	Canby	Oregon	USA	Clackamas	Hand collected	45.281	-122.685
417	1.13	2.02046	0.30545	23_8_2017	45	Portland	Oregon	USA	Multnomah	Pan trap	45.601	-122.859
459	1.16	2.11772	0.325869	27_7_2017	45	Portland	Oregon	USA	Multnomah	Hand collected	45.601	-122.859
361	1.17	2.15014	0.332467	28_7_2017	45	Portland	Oregon	USA	Multnomah	Pan trap	45.601	-122.859
420	1.19	2.21498	0.34537	23_8_2017	45	Portland	Oregon	USA	Multnomah	Pan trap	45.601	-122.859
366	1.23	2.34466	0.37008	28_7_2017	45	Portland	Oregon	USA	Multnomah	Pan trap	45.601	-122.859
415	1.23	2.34466	0.37008	23_8_2017	45	Portland	Oregon	USA	Multnomah	Pan trap	45.601	-122.859
368	1.24	2.37708	0.376044	28_7_2017	45	Portland	Oregon	USA	Multnomah	Pan trap	45.601	-122.859
448	1.24	2.37708	0.376044	29_6_2017	45	Portland	Oregon	USA	Multnomah	Pan trap	45.601	-122.859
460	1.26	2.44192	0.387731	27_7_2017	45	Portland	Oregon	USA	Multnomah	Hand collected	45.601	-122.859
416	1.27	2.47434	0.393459	23_8_2017	45	Portland	Oregon	USA	Multnomah	Pan trap	45.601	-122.859
428	1.32	2.63644	0.421018	23_8_2017	45	Portland	Oregon	USA	Multnomah	Pan trap	45.601	-122.859
357	1.33	2.66886	0.426326	28_7_2017	45	Portland	Oregon	USA	Multnomah	Pan trap	45.601	-122.859
445	1.33	2.66886	0.426326	22_8_2017	45	Portland	Oregon	USA	Multnomah	Hand collected	45.601	-122.859
356	1.35	2.7337	0.436751	28_7_2017	45	Portland	Oregon	USA	Multnomah	Pan trap	45.601	-122.859
371	1.35	2.7337	0.436751	28_7_2017	45	Portland	Oregon	USA	Multnomah	Pan trap	45.601	-122.859
359	1.36	2.76612	0.441871	28_7_2017	45	Portland	Oregon	USA	Multnomah	Pan trap	45.601	-122.859
455	1.36	2.76612	0.441871	27_7_2017	45	Portland	Oregon	USA	Multnomah	Hand collected	45.601	-122.859
93	1.37	2.79854	0.446932	28_7_2017	45	Portland	Oregon	USA	Multnomah	Pan trap	45.601	-122.859
447	1.37	2.79854	0.446932	29_6_2017	45	Portland	Oregon	USA	Multnomah	Pan trap	45.601	-122.859
442	1.38	2.83096	0.451934	22_8_2017	45	Portland	Oregon	USA	Multnomah	Hand collected	45.601	-122.859
354	1.39	2.86338	0.456879	28_7_2017	45	Portland	Oregon	USA	Multnomah	Pan trap	45.601	-122.859
355	1.39	2.86338	0.456879	28_7_2017	45	Portland	Oregon	USA	Multnomah	Pan trap	45.601	-122.859
362	1.4	2.8958	0.461769	28_7_2017	45	Portland	Oregon	USA	Multnomah	Pan trap	45.601	-122.859
365	1.41	2.92822	0.466604	28_7_2017	45	Portland	Oregon	USA	Multnomah	Pan trap	45.601	-122.859
94	1.42	2.96064	0.471386	28_7_2017	45	Portland	Oregon	USA	Multnomah	Pan trap	45.601	-122.859
363	1.42	2.96064	0.471386	28_7_2017	45	Portland	Oregon	USA	Multnomah	Pan trap	45.601	-122.859
90	1.45	3.0579	0.485423	28_7_2017	45	Portland	Oregon	USA	Multnomah	Pan trap	45.601	-122.859
458	1.45	3.0579	0.485423	29_6_2017	45	Portland	Oregon	USA	Multnomah	Hand collected	45.601	-122.859
358	1.46	3.09032	0.490003	28_7_2017	45	Portland	Oregon	USA	Multnomah	Pan trap	45.601	-122.859
426	1.46	3.09032	0.490003	23_8_2017	45	Portland	Oregon	USA	Multnomah	Pan trap	45.601	-122.859
360	1.47	3.12274	0.494536	23_8_2017	45	Portland	Oregon	USA	Multnomah	Pan trap	45.601	-122.859
370	1.48	3.15516	0.499021	23_8_2017	45	Portland	Oregon	USA	Multnomah	Pan trap	45.601	-122.859
89	1.5	3.22	0.507856	28_7_2017	45	Portland	Oregon	USA	Multnomah	Pan trap	45.601	-122.859
364	1.51	3.25242	0.512207	28_7_2017	45	Portland	Oregon	USA	Multnomah	Pan trap	45.601	-122.859
429	1.51	3.25242	0.512207	23_8_2017	45	Portland	Oregon	USA	Multnomah	Pan trap	45.601	-122.859
452	1.51	3.25242	0.512207	22_8_2017	45	Portland	Oregon	USA	Multnomah	Hand collected	45.601	-122.859
441	1.52	3.28484	0.516514	22_8_2017	45	Portland	Oregon	USA	Multnomah	Hand collected	45.601	-122.859
451	1.52	3.28484	0.516514	22_8_2017	45	Portland	Oregon	USA	Multnomah	Hand collected	45.601	-122.859
419	1.54	3.34968	0.525003	23_8_2017	45	Portland	Oregon	USA	Multnomah	Pan trap	45.601	-122.859
425	1.54	3.34968	0.525003	23_8_2017	45	Portland	Oregon	USA	Multnomah	Pan trap	45.601	-122.859
421	1.55	3.3821	0.529186	23_8_2017	45	Portland	Oregon	USA	Multnomah	Pan trap	45.601	-122.859
422	1.55	3.3821	0.529186	23_8_2017	45	Portland	Oregon	USA	Multnomah	Pan trap	45.601	-122.859
367	1.58	3.47936	0.541499	28_7_2017	45	Portland	Oregon	USA	Multnomah	Pan trap	45.601	-122.859
437	1.6	3.5442	0.549518	23_8_2017	45	Portland	Oregon	USA	Multnomah	Pan trap	45.601	-122.859
446	1.6	3.5442	0.549518	29_6_2017	45	Portland	Oregon	USA	Multnomah	Pan trap	45.601	-122.859
430	1.62	3.60904	0.557392	23_8_2017	45	Portland	Oregon	USA	Multnomah	Pan trap	45.601	-122.859
424	1.63	3.64146	0.561276	23_8_2017	45	Portland	Oregon	USA	Multnomah	Pan trap	45.601	-122.859
427	1.67	3.77114	0.576473	23_8_2017	45	Portland	Oregon	USA	Multnomah	Pan trap	45.601	-122.859
438	1.69	3.83598	0.583876	23_8_2017	45	Portland	Oregon	USA	Multnomah	Pan trap	45.601	-122.859
444	1.73	3.96566	0.598315	22_8_2017	45	Portland	Oregon	USA	Multnomah	Hand collected	45.601	-122.859
423	1.74	3.99808	0.601851	23_8_2017	45	Portland	Oregon	USA	Multnomah	Pan trap	45.601	-122.859
88	1.83	4.28986	0.632443	28_7_2017	45	Portland	Oregon	USA	Multnomah	Pan trap	45.601	-122.859
418	1.86	4.38712	0.64218	23_8_2017	45	Portland	Oregon	USA	Multnomah	Pan trap	45.601	-122.859
453	2.14	5.29488	0.723856	27_7_2017	45	Portland	Oregon	USA	Multnomah	Hand collected	45.601	-122.859
435	2.32	5.87844	0.769262	23_8_2017	45	Portland	Oregon	USA	Multnomah	Pan trap	45.601	-122.859
432	2.35	5.9757	0.776389	23_8_2017	45	Portland	Oregon	USA	Multnomah	Pan trap	45.601	-122.859
450	2.56	6.65652	0.823247	29_6_2017	45	Portland	Oregon	USA	Multnomah	Pan trap	45.601	-122.859
449	2.64	6.91588	0.839847	29_6_2017	45	Portland	Oregon	USA	Multnomah	Pan trap	45.601	-122.859
436	3	8.083	0.907573	23_8_2017	45	Portland	Oregon	USA	Multnomah	Pan trap	45.601	-122.859
434	3.47	9.60674	0.982576	23_8_2017	45	Portland	Oregon	USA	Multnomah	Pan trap	45.601	-122.859	Apis mellifera
91	3.75	10.5145	1.02179	28_7_2017	45	Portland	Oregon	USA	Multnomah	Pan trap	45.601	-122.859	Apis mellifera
433	3.86	10.8711	1.03627	23_8_2017	45	Portland	Oregon	USA	Multnomah	Pan trap	45.601	-122.859	Bombus sp.
457	3.92	11.0656	1.04398	27_7_2017	45	Portland	Oregon	USA	Multnomah	Hand collected	45.601	-122.859	Apis mellifera
456	4.18	11.9086	1.07586	29_6_2017	45	Portland	Oregon	USA	Multnomah	Hand collected	45.601	-122.859	Bombus sp.
431	4.34	12.4273	1.09438	23_8_2017	45	Portland	Oregon	USA	Multnomah	Pan trap	45.601	-122.859	Bombus sp.
440	4.34	12.4273	1.09438	22_8_2017	45	Portland	Oregon	USA	Multnomah	Hand collected	45.601	-122.859
439	4.61	13.3026	1.12394	22_8_2017	45	Portland	Oregon	USA	Multnomah	Hand collected	45.601	-122.859
140	1.17	2.15014	0.332467	28_7_2017	56	Portland	Oregon	USA	Multnomah	Pan trap	45.561	-122.683
144	1.17	2.15014	0.332467	28_7_2017	56	Portland	Oregon	USA	Multnomah	Pan trap	45.561	-122.683
145	1.19	2.21498	0.34537	28_7_2017	56	Portland	Oregon	USA	Multnomah	Pan trap	45.561	-122.683
141	1.27	2.47434	0.393459	28_7_2017	56	Portland	Oregon	USA	Multnomah	Pan trap	45.561	-122.683
149	1.3	2.5716	0.410203	28_7_2017	56	Portland	Oregon	USA	Multnomah	Pan trap	45.561	-122.683
148	1.33	2.66886	0.426326	28_7_2017	56	Portland	Oregon	USA	Multnomah	Pan trap	45.561	-122.683
30	1.36	2.76612	0.441871	28_7_2017	56	Portland	Oregon	USA	Multnomah	Pan trap	45.561	-122.683
68	1.37	2.79854	0.446932	29_6_2017	56	Portland	Oregon	USA	Multnomah	Pan trap	45.561	-122.683
146	1.37	2.79854	0.446932	28_7_2017	56	Portland	Oregon	USA	Multnomah	Pan trap	45.561	-122.683
147	1.41	2.92822	0.466604	28_7_2017	56	Portland	Oregon	USA	Multnomah	Pan trap	45.561	-122.683
142	1.46	3.09032	0.490003	28_7_2017	56	Portland	Oregon	USA	Multnomah	Pan trap	45.561	-122.683
31	1.5	3.22	0.507856	28_7_2017	56	Portland	Oregon	USA	Multnomah	Pan trap	45.561	-122.683
35	1.5	3.22	0.507856	28_7_2017	56	Portland	Oregon	USA	Multnomah	Pan trap	45.561	-122.683
33	1.53	3.31726	0.52078	28_7_2017	56	Portland	Oregon	USA	Multnomah	Pan trap	45.561	-122.683
63	1.53	3.31726	0.52078	29_6_2017	56	Portland	Oregon	USA	Multnomah	Pan trap	45.561	-122.683
150	1.53	3.31726	0.52078	28_7_2017	56	Portland	Oregon	USA	Multnomah	Pan trap	45.561	-122.683
72	1.54	3.34968	0.525003	29_6_2017	56	Portland	Oregon	USA	Multnomah	Hand collected	45.561	-122.683
74	1.54	3.34968	0.525003	29_6_2017	56	Portland	Oregon	USA	Multnomah	Hand collected	45.561	-122.683
139	1.59	3.51178	0.545527	28_7_2017	56	Portland	Oregon	USA	Multnomah	Pan trap	45.561	-122.683
49	1.65	3.7063	0.568941	29_6_2017	56	Portland	Oregon	USA	Multnomah	Pan trap	45.561	-122.683
143	1.65	3.7063	0.568941	28_7_2017	56	Portland	Oregon	USA	Multnomah	Pan trap	45.561	-122.683
32	1.67	3.77114	0.576473	28_7_2017	56	Portland	Oregon	USA	Multnomah	Pan trap	45.561	-122.683
39	1.67	3.77114	0.576473	23_8_2017	56	Portland	Oregon	USA	Multnomah	Pan trap	45.561	-122.683
60	1.71	3.90082	0.591156	29_6_2017	56	Portland	Oregon	USA	Multnomah	Pan trap	45.561	-122.683
54	1.72	3.93324	0.59475	22_7_2017	56	Portland	Oregon	USA	Multnomah	Hand collected	45.561	-122.683
67	1.73	3.96566	0.598315	29_6_2017	56	Portland	Oregon	USA	Multnomah	Pan trap	45.561	-122.683
59	1.78	4.12776	0.615714	29_6_2017	56	Portland	Oregon	USA	Multnomah	Pan trap	45.561	-122.683
58	1.78	4.12776	0.615714	29_6_2017	56	Portland	Oregon	USA	Multnomah	Pan trap	45.561	-122.683
34	1.81	4.22502	0.625829	28_7_2017	56	Portland	Oregon	USA	Multnomah	Pan trap	45.561	-122.683
71	1.81	4.22502	0.625829	29_6_2017	56	Portland	Oregon	USA	Multnomah	Hand collected	45.561	-122.683
50	1.82	4.25744	0.629149	29_6_2017	56	Portland	Oregon	USA	Multnomah	Pan trap	45.561	-122.683
57	1.85	4.3547	0.638958	29_6_2017	56	Portland	Oregon	USA	Multnomah	Pan trap	45.561	-122.683
73	1.85	4.3547	0.638958	29_6_2017	56	Portland	Oregon	USA	Multnomah	Hand collected	45.561	-122.683
56	1.86	4.38712	0.64218	29_6_2017	56	Portland	Oregon	USA	Multnomah	Pan trap	45.561	-122.683
70	1.88	4.45196	0.648551	29_6_2017	56	Portland	Oregon	USA	Multnomah	Hand collected	45.561	-122.683
28	1.92	4.58164	0.661021	28_7_2017	56	Portland	Oregon	USA	Multnomah	Pan trap	45.561	-122.683
55	1.92	4.58164	0.661021	22_8_2017	56	Portland	Oregon	USA	Multnomah	Hand collected	45.561	-122.683
51	1.97	4.74374	0.676121	29_6_2017	56	Portland	Oregon	USA	Multnomah	Pan trap	45.561	-122.683
69	2.05	5.0031	0.699239	29_6_2017	56	Portland	Oregon	USA	Multnomah	Hand collected	45.561	-122.683
29	2.08	5.10036	0.707601	28_7_2017	56	Portland	Oregon	USA	Multnomah	Pan trap	45.561	-122.683
53	2.1	5.1652	0.713087	29_6_2017	56	Portland	Oregon	USA	Multnomah	Pan trap	45.561	-122.683
52	2.22	5.55424	0.744625	29_6_2017	56	Portland	Oregon	USA	Multnomah	Pan trap	45.561	-122.683
36	2.42	6.20264	0.792577	23_8_2017	56	Portland	Oregon	USA	Multnomah	Pan trap	45.561	-122.683
38	2.59	6.75378	0.829547	23_8_2017	56	Portland	Oregon	USA	Multnomah	Pan trap	45.561	-122.683
75	2.61	6.81862	0.833696	29_6_2017	56	Portland	Oregon	USA	Multnomah	Hand collected	45.561	-122.683
137	2.64	6.91588	0.839847	28_7_2017	56	Aurora	Oregon	USA	Clackamas	Pan trap	45.561	-122.683
46	3.24	8.86108	0.947487	22_8_2017	56	Portland	Oregon	USA	Multnomah	Hand collected	45.561	-122.683
47	3.24	8.86108	0.947487	22_8_2017	56	Portland	Oregon	USA	Multnomah	Hand collected	45.561	-122.683
45	3.29	9.02318	0.95536	22_8_2017	56	Portland	Oregon	USA	Multnomah	Hand collected	45.561	-122.683
48	3.38	9.31496	0.969181	22_8_2017	56	Portland	Oregon	USA	Multnomah	Hand collected	45.561	-122.683
43	3.63	10.1255	1.00541	28_7_2017	56	Portland	Oregon	USA	Multnomah	Pan trap	45.561	-122.683
41	3.65	10.1903	1.00819	28_7_2017	56	Portland	Oregon	USA	Multnomah	Pan trap	45.561	-122.683	Apis mellifera
40	3.77	10.5793	1.02446	28_7_2017	56	Portland	Oregon	USA	Multnomah	Pan trap	45.561	-122.683
61	3.78	10.6118	1.02579	27_7_2017	56	Portland	Oregon	USA	Multnomah	Hand collected	45.561	-122.683	Apis mellifera
62	3.82	10.7414	1.03106	27_7_2017	56	Portland	Oregon	USA	Multnomah	Hand collected	45.561	-122.683	Apis mellifera
42	3.87	10.9035	1.03757	28_7_2017	56	Portland	Oregon	USA	Multnomah	Pan trap	45.561	-122.683	Apis mellifera
64	3.92	11.0656	1.04398	27_7_2017	56	Portland	Oregon	USA	Multnomah	Hand collected	45.561	-122.683	Bombus sp.
66	3.98	11.2602	1.05154	27_7_2017	56	Portland	Oregon	USA	Multnomah	Hand collected	45.561	-122.683
44	4.05	11.4871	1.06021	22_8_2017	56	Portland	Oregon	USA	Multnomah	Hand collected	45.561	-122.683	Bombus sp.
65	4.11	11.6816	1.0675	27_7_2017	56	Portland	Oregon	USA	Multnomah	Hand collected	45.561	-122.683	Bombus sp.
229	1.08	1.85836	0.26913	29_6_2017	58	Portland	Oregon	USA	Multnomah	Pan trap	45.551	-122.684
230	1.19	2.21498	0.34537	29_6_2017	58	Portland	Oregon	USA	Multnomah	Pan trap	45.551	-122.684
234	1.24	2.37708	0.376044	22_8_2017	58	Portland	Oregon	USA	Multnomah	Hand collected	45.551	-122.684
226	1.27	2.47434	0.393459	29_6_2017	58	Portland	Oregon	USA	Multnomah	Pan trap	45.551	-122.684
233	1.7	3.8684	0.587531	28_7_2017	58	Portland	Oregon	USA	Multnomah	Pan trap	45.551	-122.684
228	1.72	3.93324	0.59475	29_6_2017	58	Portland	Oregon	USA	Multnomah	Pan trap	45.551	-122.684
227	3.32	9.12044	0.960016	29_6_2017	58	Portland	Oregon	USA	Multnomah	Pan trap	45.551	-122.684
231	3.75	10.5145	1.02179	28_7_2017	58	Portland	Oregon	USA	Multnomah	Pan trap	45.551	-122.684	Apis mellifera
237	3.75	10.5145	1.02179	23_8_2017	58	Portland	Oregon	USA	Multnomah	Pan trap	45.551	-122.684	Apis mellifera
225	3.79	10.6442	1.02711	29_6_2017	58	Portland	Oregon	USA	Multnomah	Pan trap	45.551	-122.684	Apis mellifera
223	3.92	11.0656	1.04398	27_7_2017	58	Portland	Oregon	USA	Multnomah	Hand collected	45.551	-122.684	Bombus sp.
224	3.92	11.0656	1.04398	27_7_2017	58	Portland	Oregon	USA	Multnomah	Hand collected	45.551	-122.684	Apis mellifera
235	3.97	11.2277	1.05029	22_8_2017	58	Portland	Oregon	USA	Multnomah	Hand collected	45.551	-122.684	Apis mellifera
236	4.23	12.0707	1.08173	22_8_2017	58	Portland	Oregon	USA	Multnomah	Hand collected	45.551	-122.684	Bombus sp.
232	4.5	12.946	1.11214	28_7_2017	58	Portland	Oregon	USA	Multnomah	Pan trap	45.551	-122.684	Bombus sp.
238	4.76	13.7889	1.13953	23_8_2017	58	Portland	Oregon	USA	Multnomah	Pan trap	45.551	-122.684	Bombus sp.
730	1.39	2.86338	0.456879	25_7_2017	61	Aurora	Oregon	USA	Clackamas	Hand collected	45.292	-122.781
746	1.44	3.02548	0.480794	26_7_2017	61	Aurora	Oregon	USA	Clackamas	Pan trap	45.292	-122.781
135	1.53	3.31726	0.52078	26_8_2017	61	Aurora	Oregon	USA	Clackamas	Pan trap	45.292	-122.781
744	1.53	3.31726	0.52078	26_7_2017	61	Aurora	Oregon	USA	Clackamas	Pan trap	45.292	-122.781
745	1.56	3.41452	0.53333	26_7_2017	61	Aurora	Oregon	USA	Clackamas	Pan trap	45.292	-122.781
737	1.6	3.5442	0.549518	26_7_2017	61	Aurora	Oregon	USA	Clackamas	Pan trap	45.292	-122.781
130	1.68	3.80356	0.58019	26_8_2017	61	Aurora	Oregon	USA	Clackamas	Pan trap	45.292	-122.781
736	1.76	4.06292	0.608838	26_7_2017	61	Aurora	Oregon	USA	Clackamas	Pan trap	45.292	-122.781
127	1.77	4.09534	0.61229	26_8_2017	61	Aurora	Oregon	USA	Clackamas	Pan trap	45.292	-122.781
741	1.77	4.09534	0.61229	24_8_2017	61	Aurora	Oregon	USA	Clackamas	Hand collected	45.292	-122.781
738	1.8	4.1926	0.622483	24_8_2017	61	Aurora	Oregon	USA	Clackamas	Hand collected	45.292	-122.781
132	1.81	4.22502	0.625829	26_8_2017	61	Aurora	Oregon	USA	Clackamas	Pan trap	45.292	-122.781
134	1.81	4.22502	0.625829	26_8_2017	61	Aurora	Oregon	USA	Clackamas	Pan trap	45.292	-122.781
128	1.82	4.25744	0.629149	26_8_2017	61	Aurora	Oregon	USA	Clackamas	Pan trap	45.292	-122.781
136	1.83	4.28986	0.632443	26_8_2017	61	Aurora	Oregon	USA	Clackamas	Pan trap	45.292	-122.781
133	1.87	4.41954	0.645377	26_8_2017	61	Aurora	Oregon	USA	Clackamas	Pan trap	45.292	-122.781
131	2.05	5.0031	0.699239	26_8_2017	61	Aurora	Oregon	USA	Clackamas	Pan trap	45.292	-122.781
725	2.36	6.00812	0.778739	26_7_2017	61	Aurora	Oregon	USA	Clackamas	Pan trap	45.292	-122.781
726	2.5	6.462	0.810367	21_6_2017	61	Aurora	Oregon	USA	Clackamas	Pan trap	45.292	-122.781
734	2.65	6.9483	0.841879	26_7_2017	61	Aurora	Oregon	USA	Clackamas	Pan trap	45.292	-122.781
728	2.72	7.17524	0.855836	26_7_2017	61	Aurora	Oregon	USA	Clackamas	Pan trap	45.292	-122.781
729	3.42	9.44464	0.975185	26_7_2017	61	Aurora	Oregon	USA	Clackamas	Pan trap	45.292	-122.781	Apis mellifera
747	3.52	9.76884	0.989843	26_8_2017	61	Aurora	Oregon	USA	Clackamas	Pan trap	45.292	-122.781	Apis mellifera
733	3.54	9.83368	0.992716	26_7_2017	61	Aurora	Oregon	USA	Clackamas	Pan trap	45.292	-122.781	Apis mellifera
722	3.57	9.93094	0.99699	20_6_2017	61	Aurora	Oregon	USA	Clackamas	Hand collected	45.292	-122.781	Apis mellifera
751	3.6	10.0282	1.00122	26_8_2017	61	Aurora	Oregon	USA	Clackamas	Pan trap	45.292	-122.781	Apis mellifera
749	3.61	10.0606	1.00262	24_8_2017	61	Aurora	Oregon	USA	Clackamas	Hand collected	45.292	-122.781	Apis mellifera
750	3.64	10.1579	1.0068	26_8_2017	61	Aurora	Oregon	USA	Clackamas	Pan trap	45.292	-122.781	Apis mellifera
719	3.69	10.32	1.01368	20_6_2017	61	Aurora	Oregon	USA	Clackamas	Hand collected	45.292	-122.781	Apis mellifera
721	3.74	10.4821	1.02045	20_6_2017	61	Aurora	Oregon	USA	Clackamas	Hand collected	45.292	-122.781	Apis mellifera
731	3.75	10.5145	1.02179	20_6_2017	61	Aurora	Oregon	USA	Clackamas	Hand collected	45.292	-122.781	Apis mellifera
739	3.75	10.5145	1.02179	26_7_2017	61	Aurora	Oregon	USA	Clackamas	Pan trap	45.292	-122.781	Apis mellifera
727	3.77	10.5793	1.02446	26_8_2017	61	Aurora	Oregon	USA	Clackamas	Pan trap	45.292	-122.781	Apis mellifera
735	3.79	10.6442	1.02711	26_7_2017	61	Aurora	Oregon	USA	Clackamas	Pan trap	45.292	-122.781	Apis mellifera
752	3.83	10.7739	1.03237	26_8_2017	61	Aurora	Oregon	USA	Clackamas	Pan trap	45.292	-122.781	Apis mellifera
732	3.97	11.2277	1.05029	20_6_2017	61	Aurora	Oregon	USA	Clackamas	Hand collected	45.292	-122.781	Apis mellifera
740	4.01	11.3574	1.05528	24_8_2017	61	Aurora	Oregon	USA	Clackamas	Hand collected	45.292	-122.781	Bombus sp.
742	4.02	11.3898	1.05652	24_8_2017	61	Aurora	Oregon	USA	Clackamas	Hand collected	45.292	-122.781	Bombus sp.
720	4.18	11.9086	1.07586	20_6_2017	61	Aurora	Oregon	USA	Clackamas	Hand collected	45.292	-122.781	Bombus sp.
748	4.23	12.0707	1.08173	26_8_2017	61	Aurora	Oregon	USA	Clackamas	Pan trap	45.292	-122.781	Bombus sp.
743	6.26	18.6519	1.27072	24_8_2017	61	Aurora	Oregon	USA	Clackamas	Hand collected	45.292	-122.781
266	1.24	2.37708	0.376044	29_6_2017	63	Portland	Oregon	USA	Multnomah	Hand collected	45.574	-122.789
803	1.33	2.66886	0.426326	29_6_2017	63	Portland	Oregon	USA	Multnomah	Hand collected	45.574	-122.789
267	1.4	2.8958	0.461769	26_8_2017	63	Portland	Oregon	USA	Multnomah	Pan trap	45.574	-122.789
263	1.54	3.34968	0.525003	26_8_2017	63	Portland	Oregon	USA	Multnomah	Pan trap	45.574	-122.789
262	1.78	4.12776	0.615714	26_8_2017	63	Portland	Oregon	USA	Multnomah	Pan trap	45.574	-122.789
268	1.8	4.1926	0.622483	26_8_2017	63	Portland	Oregon	USA	Multnomah	Pan trap	45.574	-122.789
261	3.5	9.704	0.986951	26_8_2017	63	Portland	Oregon	USA	Multnomah	Pan trap	45.574	-122.789	Bombus sp.
260	4.15	11.8113	1.0723	26_8_2017	63	Portland	Oregon	USA	Multnomah	Pan trap	45.574	-122.789
264	4.18	11.9086	1.07586	29_6_2017	63	Portland	Oregon	USA	Multnomah	Pan trap	45.574	-122.789
265	4.2	11.9734	1.07822	29_6_2017	63	Portland	Oregon	USA	Multnomah	Hand collected	45.574	-122.789
383	1.42	2.96064	0.471386	28_7_2017	82	Portland	Oregon	USA	Multnomah	Pan trap	45.553	-122.638
376	1.46	3.09032	0.490003	29_6_2017	82	Portland	Oregon	USA	Multnomah	Pan trap	45.553	-122.638
384	1.49	3.18758	0.503461	29_6_2017	82	Portland	Oregon	USA	Multnomah	Pan trap	45.553	-122.638
373	1.5	3.22	0.507856	29_6_2017	82	Portland	Oregon	USA	Multnomah	Pan trap	45.553	-122.638
378	1.5	3.22	0.507856	29_6_2017	82	Portland	Oregon	USA	Multnomah	Pan trap	45.553	-122.638
388	1.53	3.31726	0.52078	28_7_2017	82	Portland	Oregon	USA	Multnomah	Pan trap	45.553	-122.638
375	1.55	3.3821	0.529186	29_6_2017	82	Portland	Oregon	USA	Multnomah	Pan trap	45.553	-122.638
377	1.62	3.60904	0.557392	29_6_2017	82	Portland	Oregon	USA	Multnomah	Pan trap	45.553	-122.638
382	1.65	3.7063	0.568941	28_7_2017	82	Portland	Oregon	USA	Multnomah	Pan trap	45.553	-122.638
380	1.72	3.93324	0.59475	29_6_2017	82	Portland	Oregon	USA	Multnomah	Pan trap	45.553	-122.638
387	1.72	3.93324	0.59475	28_7_2017	82	Portland	Oregon	USA	Multnomah	Pan trap	45.553	-122.638
385	2.72	7.17524	0.855836	28_7_2017	82	Portland	Oregon	USA	Multnomah	Pan trap	45.553	-122.638
372	3.72	10.4172	1.01775	22_8_2017	82	Portland	Oregon	USA	Multnomah	Hand collected	45.553	-122.638	Apis mellifera
386	3.8	10.6766	1.02843	28_7_2017	82	Portland	Oregon	USA	Multnomah	Pan trap	45.553	-122.638	Apis mellifera
381	3.86	10.8711	1.03627	29_6_2017	82	Portland	Oregon	USA	Multnomah	Pan trap	45.553	-122.638	Apis mellifera
379	4.64	13.3999	1.1271	29_6_2017	82	Portland	Oregon	USA	Multnomah	Pan trap	45.553	-122.638	Bombus sp.
307	1.07	1.82594	0.261487	28_7_2017	88	Portland	Oregon	USA	Multnomah	Pan trap	45.484	-122.693
342	1.19	2.21498	0.34537	27_7_2017	88	Portland	Oregon	USA	Multnomah	Hand collected	45.484	-122.693
317	1.31	2.60402	0.415644	29_8_2017	88	Portland	Oregon	USA	Multnomah	Pan trap	45.484	-122.693
310	1.32	2.63644	0.421018	28_7_2017	88	Portland	Oregon	USA	Multnomah	Pan trap	45.484	-122.693
328	1.34	2.70128	0.43157	28_7_2017	88	Portland	Oregon	USA	Multnomah	Pan trap	45.484	-122.693
329	1.36	2.76612	0.441871	29_8_2017	88	Portland	Oregon	USA	Multnomah	Pan trap	45.484	-122.693
313	1.39	2.86338	0.456879	28_7_2017	88	Portland	Oregon	USA	Multnomah	Pan trap	45.484	-122.693
312	1.41	2.92822	0.466604	28_7_2017	88	Portland	Oregon	USA	Multnomah	Pan trap	45.484	-122.693
316	1.46	3.09032	0.490003	29_8_2017	88	Portland	Oregon	USA	Multnomah	Pan trap	45.484	-122.693
341	1.47	3.12274	0.494536	29_6_2017	88	Portland	Oregon	USA	Multnomah	Hand collected	45.484	-122.693
314	1.54	3.34968	0.525003	28_7_2017	88	Portland	Oregon	USA	Multnomah	Pan trap	45.484	-122.693
340	1.57	3.44694	0.537434	29_6_2017	88	Portland	Oregon	USA	Multnomah	Hand collected	45.484	-122.693
350	1.62	3.60904	0.557392	29_6_2017	88	Portland	Oregon	USA	Multnomah	Pan trap	45.484	-122.693
347	1.69	3.83598	0.583876	29_6_2017	88	Portland	Oregon	USA	Multnomah	Hand collected	45.484	-122.693
349	1.8	4.1926	0.622483	29_6_2017	88	Portland	Oregon	USA	Multnomah	Hand collected	45.484	-122.693
325	1.82	4.25744	0.629149	29_8_2017	88	Portland	Oregon	USA	Multnomah	Pan trap	45.484	-122.693
343	1.82	4.25744	0.629149	24_8_2017	88	Portland	Oregon	USA	Multnomah	Hand collected	45.484	-122.693
348	1.9	4.5168	0.654831	27_7_2017	88	Portland	Oregon	USA	Multnomah	Hand collected	45.484	-122.693
351	1.97	4.74374	0.676121	29_6_2017	88	Portland	Oregon	USA	Multnomah	Pan trap	45.484	-122.693
319	2.27	5.71634	0.757118	28_7_2017	88	Portland	Oregon	USA	Multnomah	Pan trap	45.484	-122.693
338	2.59	6.75378	0.829547	27_7_2017	88	Portland	Oregon	USA	Multnomah	Hand collected	45.484	-122.693	Bombus sp.
323	2.76	7.30492	0.863615	24_8_2017	88	Portland	Oregon	USA	Multnomah	Pan trap	45.484	-122.693
326	3.48	9.63916	0.984039	29_8_2017	88	Portland	Oregon	USA	Multnomah	Pan trap	45.484	-122.693	Apis mellifera
337	3.51	9.73642	0.988399	27_7_2017	88	Portland	Oregon	USA	Multnomah	Hand collected	45.484	-122.693
330	3.72	10.4172	1.01775	29_8_2017	88	Portland	Oregon	USA	Multnomah	Pan trap	45.484	-122.693	Apis mellifera
327	3.77	10.5793	1.02446	29_8_2017	88	Portland	Oregon	USA	Multnomah	Pan trap	45.484	-122.693	Apis mellifera
309	3.78	10.6118	1.02579	28_7_2017	88	Portland	Oregon	USA	Multnomah	Pan trap	45.484	-122.693
333	3.82	10.7414	1.03106	24_7_2017	88	Portland	Oregon	USA	Multnomah	Pan trap	45.484	-122.693	Apis mellifera
352	3.95	11.1629	1.04778	29_6_2017	88	Portland	Oregon	USA	Multnomah	Hand collected	45.484	-122.693
315	3.98	11.2602	1.05154	29_8_2017	88	Portland	Oregon	USA	Multnomah	Pan trap	45.484	-122.693
344	4.01	11.3574	1.05528	27_7_2017	88	Portland	Oregon	USA	Multnomah	Hand collected	45.484	-122.693	Bombus sp.
334	4.02	11.3898	1.05652	24_8_2017	88	Portland	Oregon	USA	Multnomah	Hand collected	45.484	-122.693	Apis mellifera
322	4.05	11.4871	1.06021	28_7_2017	88	Portland	Oregon	USA	Multnomah	Pan trap	45.484	-122.693
346	4.09	11.6168	1.06509	27_7_2017	88	Portland	Oregon	USA	Multnomah	Hand collected	45.484	-122.693	Bombus sp.
353	4.11	11.6816	1.0675	29_6_2017	88	Portland	Oregon	USA	Multnomah	Hand collected	45.484	-122.693
320	4.14	11.7789	1.0711	28_7_2017	88	Portland	Oregon	USA	Multnomah	Pan trap	45.484	-122.693
336	4.25	12.1355	1.08406	24_8_2017	88	Portland	Oregon	USA	Multnomah	Hand collected	45.484	-122.693	Bombus sp.
318	4.28	12.2328	1.08752	28_7_2017	88	Portland	Oregon	USA	Multnomah	Pan trap	45.484	-122.693
345	4.28	12.2328	1.08752	29_6_2017	88	Portland	Oregon	USA	Multnomah	Hand collected	45.484	-122.693	Bombus sp.
335	4.32	12.3624	1.0921	24_8_2017	88	Portland	Oregon	USA	Multnomah	Hand collected	45.484	-122.693
311	4.33	12.3949	1.09324	28_7_2017	88	Portland	Oregon	USA	Multnomah	Pan trap	45.484	-122.693
321	4.38	12.557	1.09888	28_7_2017	88	Portland	Oregon	USA	Multnomah	Pan trap	45.484	-122.693
308	4.41	12.6542	1.10224	28_7_2017	88	Portland	Oregon	USA	Multnomah	Pan trap	45.484	-122.693
331	4.51	12.9784	1.11322	29_8_2017	88	Portland	Oregon	USA	Multnomah	Pan trap	45.484	-122.693
332	4.85	14.0807	1.14862	29_8_2017	88	Portland	Oregon	USA	Multnomah	Pan trap	45.484	-122.693
324	5.23	15.3127	1.18505	29_8_2017	88	Portland	Oregon	USA	Multnomah	Pan trap	45.484	-122.693
196	1.01	1.63142	0.212566	26_7_2017	91	Portland	Oregon	USA	Multnomah	Pan trap	45.474	-122.602
157	1.05	1.7611	0.245784	25_7_2017	91	Portland	Oregon	USA	Multnomah	Hand collected	45.474	-122.602
161	1.09	1.89078	0.276641	25_7_2017	91	Portland	Oregon	USA	Multnomah	Hand collected	45.474	-122.602
197	1.09	1.89078	0.276641	23_8_2017	91	Portland	Oregon	USA	Multnomah	Pan trap	45.474	-122.602
198	1.14	2.05288	0.312364	23_8_2017	91	Portland	Oregon	USA	Multnomah	Pan trap	45.474	-122.602
179	1.26	2.44192	0.387731	22_8_2017	91	Portland	Oregon	USA	Multnomah	Hand collected	45.474	-122.602
165	1.27	2.47434	0.393459	22_8_2017	91	Portland	Oregon	USA	Multnomah	Hand collected	45.474	-122.602
92	1.32	2.63644	0.421018	26_7_2017	91	Portland	Oregon	USA	Multnomah	Pan trap	45.474	-122.602
166	1.32	2.63644	0.421018	22_8_2017	91	Portland	Oregon	USA	Multnomah	Hand collected	45.474	-122.602
160	1.35	2.7337	0.436751	25_7_2017	91	Portland	Oregon	USA	Multnomah	Hand collected	45.474	-122.602
175	1.35	2.7337	0.436751	22_8_2017	91	Portland	Oregon	USA	Multnomah	Hand collected	45.474	-122.602
181	1.37	2.79854	0.446932	22_8_2017	91	Portland	Oregon	USA	Multnomah	Hand collected	45.474	-122.602
195	1.46	3.09032	0.490003	26_7_2017	91	Portland	Oregon	USA	Multnomah	Pan trap	45.474	-122.602
154	1.51	3.25242	0.512207	21_6_2017	91	Portland	Oregon	USA	Multnomah	Pan trap	45.474	-122.602
95	1.55	3.3821	0.529186	26_7_2017	91	Portland	Oregon	USA	Multnomah	Pan trap	45.474	-122.602
189	1.59	3.51178	0.545527	23_8_2017	91	Portland	Oregon	USA	Multnomah	Pan trap	45.474	-122.602
158	1.62	3.60904	0.557392	25_7_2017	91	Portland	Oregon	USA	Multnomah	Hand collected	45.474	-122.602
190	1.62	3.60904	0.557392	23_8_2017	91	Portland	Oregon	USA	Multnomah	Pan trap	45.474	-122.602
169	1.63	3.64146	0.561276	22_8_2017	91	Portland	Oregon	USA	Multnomah	Hand collected	45.474	-122.602
178	1.67	3.77114	0.576473	22_8_2017	91	Portland	Oregon	USA	Multnomah	Hand collected	45.474	-122.602
180	1.71	3.90082	0.591156	22_8_2017	91	Portland	Oregon	USA	Multnomah	Hand collected	45.474	-122.602
171	1.72	3.93324	0.59475	22_8_2017	91	Portland	Oregon	USA	Multnomah	Hand collected	45.474	-122.602
173	1.81	4.22502	0.625829	22_8_2017	91	Portland	Oregon	USA	Multnomah	Hand collected	45.474	-122.602
176	1.86	4.38712	0.64218	22_8_2017	91	Portland	Oregon	USA	Multnomah	Hand collected	45.474	-122.602
182	1.96	4.71132	0.673143	22_8_2017	91	Portland	Oregon	USA	Multnomah	Hand collected	45.474	-122.602
156	2.09	5.13278	0.710353	25_7_2017	91	Portland	Oregon	USA	Multnomah	Hand collected	45.474	-122.602
167	2.4	6.1378	0.788013	25_7_2017	91	Portland	Oregon	USA	Multnomah	Hand collected	45.474	-122.602
152	2.45	6.2999	0.799334	25_7_2017	91	Portland	Oregon	USA	Multnomah	Hand collected	45.474	-122.602
174	2.82	7.49944	0.875029	22_8_2017	91	Portland	Oregon	USA	Multnomah	Hand collected	45.474	-122.602
163	2.92	7.82364	0.893409	25_7_2017	91	Portland	Oregon	USA	Multnomah	Hand collected	45.474	-122.602
164	3.2	8.7314	0.941084	25_7_2017	91	Portland	Oregon	USA	Multnomah	Hand collected	45.474	-122.602	Bombus sp.
159	3.38	9.31496	0.969181	25_7_2017	91	Portland	Oregon	USA	Multnomah	Hand collected	45.474	-122.602	Apis mellifera
172	3.45	9.5419	0.979635	22_8_2017	91	Portland	Oregon	USA	Multnomah	Hand collected	45.474	-122.602	Bombus sp.
153	3.64	10.1579	1.0068	25_7_2017	91	Portland	Oregon	USA	Multnomah	Hand collected	45.474	-122.602
162	3.64	10.1579	1.0068	25_7_2017	91	Portland	Oregon	USA	Multnomah	Hand collected	45.474	-122.602	Bombus sp.
155	3.73	10.4497	1.0191	25_7_2017	91	Portland	Oregon	USA	Multnomah	Hand collected	45.474	-122.602
170	3.75	10.5145	1.02179	22_8_2017	91	Portland	Oregon	USA	Multnomah	Hand collected	45.474	-122.602	Apis mellifera
151	3.78	10.6118	1.02579	25_7_2017	91	Portland	Oregon	USA	Multnomah	Hand collected	45.474	-122.602	Apis mellifera
168	3.8	10.6766	1.02843	25_7_2017	91	Portland	Oregon	USA	Multnomah	Hand collected	45.474	-122.602	Apis mellifera
193	4.04	11.4547	1.05898	23_8_2017	91	Portland	Oregon	USA	Multnomah	Pan trap	45.474	-122.602	Bombus sp.
188	4.09	11.6168	1.06509	23_8_2017	91	Portland	Oregon	USA	Multnomah	Pan trap	45.474	-122.602	Bombus sp.
194	4.1	11.6492	1.0663	23_8_2017	91	Portland	Oregon	USA	Multnomah	Pan trap	45.474	-122.602	Bombus sp.
186	4.15	11.8113	1.0723	23_8_2017	91	Portland	Oregon	USA	Multnomah	Pan trap	45.474	-122.602	Bombus sp.
192	4.3	12.2976	1.08982	23_8_2017	91	Portland	Oregon	USA	Multnomah	Pan trap	45.474	-122.602	Bombus sp.
185	4.41	12.6542	1.10224	23_8_2017	91	Portland	Oregon	USA	Multnomah	Pan trap	45.474	-122.602	Bombus sp.
177	4.65	13.4323	1.12815	22_8_2017	91	Portland	Oregon	USA	Multnomah	Hand collected	45.474	-122.602	Bombus sp.
187	4.76	13.7889	1.13953	23_8_2017	91	Portland	Oregon	USA	Multnomah	Pan trap	45.474	-122.602	Bombus sp.
184	4.85	14.0807	1.14862	23_8_2017	91	Portland	Oregon	USA	Multnomah	Pan trap	45.474	-122.602	Bombus sp.
253	1.39	2.86338	0.456879	29_6_2017	102	Portland	Oregon	USA	Multnomah	Hand collected	45.456	-122.648
246	1.44	3.02548	0.480794	21_6_2017	102	Portland	Oregon	USA	Multnomah	Pan trap	45.456	-122.648
257	1.48	3.15516	0.499021	27_7_2017	102	Portland	Oregon	USA	Multnomah	Hand collected	45.456	-122.648
239	1.55	3.3821	0.529186	26_8_2017	102	Portland	Oregon	USA	Multnomah	Pan trap	45.456	-122.648
255	1.55	3.3821	0.529186	27_7_2017	102	Portland	Oregon	USA	Multnomah	Hand collected	45.456	-122.648
247	1.58	3.47936	0.541499	21_6_2017	102	Portland	Oregon	USA	Multnomah	Pan trap	45.456	-122.648
254	1.58	3.47936	0.541499	29_6_2017	102	Portland	Oregon	USA	Multnomah	Hand collected	45.456	-122.648
259	1.62	3.60904	0.557392	27_7_2017	102	Portland	Oregon	USA	Multnomah	Hand collected	45.456	-122.648
242	1.64	3.67388	0.565125	21_6_2017	102	Portland	Oregon	USA	Multnomah	Pan trap	45.456	-122.648
256	1.85	4.3547	0.638958	27_7_2017	102	Portland	Oregon	USA	Multnomah	Hand collected	45.456	-122.648
243	1.86	4.38712	0.64218	21_6_2017	102	Portland	Oregon	USA	Multnomah	Pan trap	45.456	-122.648
240	2.09	5.13278	0.710353	26_8_2017	102	Portland	Oregon	USA	Multnomah	Pan trap	45.456	-122.648
258	2.41	6.17022	0.790301	27_7_2017	102	Portland	Oregon	USA	Multnomah	Hand collected	45.456	-122.648
244	2.73	7.20766	0.857794	21_6_2017	102	Portland	Oregon	USA	Multnomah	Pan trap	45.456	-122.648
245	3.45	9.5419	0.979635	21_6_2017	102	Portland	Oregon	USA	Multnomah	Pan trap	45.456	-122.648	Apis mellifera
241	3.48	9.63916	0.984039	24_8_2017	102	Portland	Oregon	USA	Multnomah	Hand collected	45.456	-122.648	Apis mellifera
252	3.83	10.7739	1.03237	29_6_2017	102	Portland	Oregon	USA	Multnomah	Hand collected	45.456	-122.648	Apis mellifera
251	3.88	10.936	1.03886	29_6_2017	102	Portland	Oregon	USA	Multnomah	Hand collected	45.456	-122.648
805	4.23	12.0707	1.08173	26_7_2017	102	Portland	Oregon	USA	Multnomah	Pan trap	45.456	-122.648	Bombus sp.
249	4.44	12.7515	1.10556	29_6_2017	102	Portland	Oregon	USA	Multnomah	Hand collected	45.456	-122.648
250	4.47	12.8487	1.10886	29_6_2017	102	Portland	Oregon	USA	Multnomah	Hand collected	45.456	-122.648
248	4.53	13.0433	1.11539	29_6_2017	102	Portland	Oregon	USA	Multnomah	Hand collected	45.456	-122.648
4	1.01	1.63142	0.212566	23_7_2017	103	Portland	Oregon	USA	Multnomah	Pan trap	45.529	-122.63
5	1.41	2.92822	0.466604	22_7_2017	103	Portland	Oregon	USA	Multnomah	Hand collected	45.529	-122.63
16	1.49	3.18758	0.503461	25_7_2017	103	Portland	Oregon	USA	Multnomah	Hand collected	45.529	-122.63
20	1.49	3.18758	0.503461	22_7_2017	103	Portland	Oregon	USA	Multnomah	Hand collected	45.529	-122.63
21	1.55	3.3821	0.529186	25_7_2017	103	Portland	Oregon	USA	Multnomah	Hand collected	45.529	-122.63
18	1.56	3.41452	0.53333	25_7_2017	103	Portland	Oregon	USA	Multnomah	Hand collected	45.529	-122.63
15	1.58	3.47936	0.541499	21_6_2017	103	Portland	Oregon	USA	Multnomah	Pan trap	45.529	-122.63
19	1.67	3.77114	0.576473	22_8_2017	103	Portland	Oregon	USA	Multnomah	Hand collected	45.529	-122.63
17	1.68	3.80356	0.58019	25_7_2017	103	Portland	Oregon	USA	Multnomah	Hand collected	45.529	-122.63
9	1.81	4.22502	0.625829	22_7_2017	103	Portland	Oregon	USA	Multnomah	Hand collected	45.529	-122.63
6	1.83	4.28986	0.632443	22_7_2017	103	Portland	Oregon	USA	Multnomah	Hand collected	45.529	-122.63
13	2.28	5.74876	0.759574	22_7_2017	103	Portland	Oregon	USA	Multnomah	Hand collected	45.529	-122.63
7	2.44	6.26748	0.797093	22_7_2017	103	Portland	Oregon	USA	Multnomah	Hand collected	45.529	-122.63	Apis mellifera
3	2.55	6.6241	0.821127	26_7_2017	103	Portland	Oregon	USA	Multnomah	Pan trap	45.529	-122.63
11	3.43	9.47706	0.976674	22_7_2017	103	Portland	Oregon	USA	Multnomah	Hand collected	45.529	-122.63	Apis mellifera
24	3.43	9.47706	0.976674	20_6_2017	103	Portland	Oregon	USA	Multnomah	Hand collected	45.529	-122.63
23	3.45	9.5419	0.979635	20_6_2017	103	Portland	Oregon	USA	Multnomah	Hand collected	45.529	-122.63	Bombus sp.
25	3.57	9.93094	0.99699	20_6_2017	103	Portland	Oregon	USA	Multnomah	Hand collected	45.529	-122.63	Apis mellifera
14	3.6	10.0282	1.00122	22_7_2017	103	Portland	Oregon	USA	Multnomah	Hand collected	45.529	-122.63	Apis mellifera
8	3.66	10.2227	1.00957	22_7_2017	103	Portland	Oregon	USA	Multnomah	Hand collected	45.529	-122.63
27	3.72	10.4172	1.01775	20_6_2017	103	Portland	Oregon	USA	Multnomah	Hand collected	45.529	-122.63	Bombus sp.
10	3.77	10.5793	1.02446	22_7_2017	103	Portland	Oregon	USA	Multnomah	Hand collected	45.529	-122.63
1	3.79	10.6442	1.02711	26_7_2017	103	Portland	Oregon	USA	Multnomah	Pan trap	45.529	-122.63	Apis mellifera
12	3.95	11.1629	1.04778	23_7_2017	103	Portland	Oregon	USA	Multnomah	Pan trap	45.529	-122.63	Apis mellifera
26	4.12	11.714	1.06871	20_6_2017	103	Portland	Oregon	USA	Multnomah	Hand collected	45.529	-122.63	Bombus sp.
22	4.42	12.6866	1.10335	20_6_2017	103	Portland	Oregon	USA	Multnomah	Hand collected	45.529	-122.63	Bombus sp.
807	1.19	2.21498	0.34537	28_7_2017	104	Portland	Oregon	USA	Multnomah	Pan Trap	45.567	-122.66
811	1.31	2.60402	0.415644	22_8_2017	104	Portland	Oregon	USA	Multnomah	Pan Trap	45.567	-122.66
221	1.39	2.86338	0.456879	22_8_2017	104	Portland	Oregon	USA	Multnomah	Hand collected	45.567	-122.66
215	1.44	3.02548	0.480794	22_8_2017	104	Portland	Oregon	USA	Multnomah	Pan trap	45.567	-122.66
813	1.46	3.09032	0.490003	28_7_2017	104	Portland	Oregon	USA	Multnomah	Pan Trap	45.567	-122.66
219	1.62	3.60904	0.557392	22_8_2017	104	Portland	Oregon	USA	Multnomah	Pan trap	45.567	-122.66
808	1.74	3.99808	0.601851	22_8_2017	104	Portland	Oregon	USA	Multnomah	Pan Trap	45.567	-122.66
211	1.86	4.38712	0.64218	27_7_2017	104	Portland	Oregon	USA	Multnomah	Hand collected	45.567	-122.66
212	1.91	4.54922	0.657937	27_7_2017	104	Portland	Oregon	USA	Multnomah	Hand collected	45.567	-122.66
213	1.97	4.74374	0.676121	22_8_2017	104	Portland	Oregon	USA	Multnomah	Hand collected	45.567	-122.66
214	2.01	4.87342	0.687834	22_8_2017	104	Portland	Oregon	USA	Multnomah	Hand collected	45.567	-122.66
210	2.12	5.23004	0.718505	22_8_2017	104	Portland	Oregon	USA	Multnomah	Hand collected	45.567	-122.66
205	2.41	6.17022	0.790301	29_6_2017	104	Portland	Oregon	USA	Multnomah	Pan trap	45.567	-122.66
809	2.44	6.26748	0.797093	22_8_2017	104	Portland	Oregon	USA	Multnomah	Pan Trap	45.567	-122.66
209	3.06	8.27752	0.9179	22_8_2017	104	Portland	Oregon	USA	Multnomah	Hand collected	45.567	-122.66
220	3.09	8.37478	0.922973	22_8_2017	104	Portland	Oregon	USA	Multnomah	Pan trap	45.567	-122.66
218	3.37	9.28254	0.967667	29_6_2017	104	Portland	Oregon	USA	Multnomah	Pan trap	45.567	-122.66	Apis mellifera
204	3.42	9.44464	0.975185	27_7_2017	104	Portland	Oregon	USA	Multnomah	Hand collected	45.567	-122.66	Apis mellifera
756	3.6	10.0282	1.00122	22_8_2017	104	Portland	Oregon	USA	Multnomah	Pan trap	45.567	-122.66	Apis mellifera
199	3.66	10.2227	1.00957	25_7_2017	104	Portland	Oregon	USA	Multnomah	Hand collected	45.567	-122.66
753	3.69	10.32	1.01368	22_8_2017	104	Portland	Oregon	USA	Multnomah	Pan trap	45.567	-122.66	Apis mellifera
203	3.78	10.6118	1.02579	27_7_2017	104	Portland	Oregon	USA	Multnomah	Hand collected	45.567	-122.66	Apis mellifera
754	3.78	10.6118	1.02579	22_8_2017	104	Portland	Oregon	USA	Multnomah	Pan trap	45.567	-122.66	Apis mellifera
755	3.78	10.6118	1.02579	22_8_2017	104	Portland	Oregon	USA	Multnomah	Pan trap	45.567	-122.66	Apis mellifera
758	3.78	10.6118	1.02579	28_7_2017	104	Portland	Oregon	USA	Multnomah	Pan trap	45.567	-122.66	Apis mellifera
208	3.8	10.6766	1.02843	27_7_2017	104	Portland	Oregon	USA	Multnomah	Hand collected	45.567	-122.66	Apis mellifera
759	3.84	10.8063	1.03368	28_7_2017	104	Portland	Oregon	USA	Multnomah	Pan trap	45.567	-122.66	Apis mellifera
222	3.91	11.0332	1.0427	22_8_2017	104	Portland	Oregon	USA	Multnomah	Hand collected	45.567	-122.66	Apis mellifera
202	3.95	11.1629	1.04778	27_7_2017	104	Portland	Oregon	USA	Multnomah	Hand collected	45.567	-122.66
206	3.96	11.1953	1.04904	29_6_2017	104	Portland	Oregon	USA	Multnomah	Pan trap	45.567	-122.66	Bombus sp.
216	3.96	11.1953	1.04904	22_8_2017	104	Portland	Oregon	USA	Multnomah	Hand collected	45.567	-122.66	Apis mellifera
207	3.97	11.2277	1.05029	25_7_2017	104	Portland	Oregon	USA	Multnomah	Hand collected	45.567	-122.66	Apis mellifera
804	4.12	11.714	1.06871	28_7_2017	104	Portland	Oregon	USA	Multnomah	Pan trap	45.567	-122.66	Apis mellifera
201	4.27	12.2003	1.08637	27_7_2017	104	Portland	Oregon	USA	Multnomah	Hand collected	45.567	-122.66
200	4.34	12.4273	1.09438	25_7_2017	104	Portland	Oregon	USA	Multnomah	Hand collected	45.567	-122.66
217	4.92	14.3076	1.15557	22_8_2017	104	Portland	Oregon	USA	Multnomah	Hand collected	45.567	-122.66
480	1.42	2.96064	0.471386	26_7_2017	111	Woodburn	Oregon	USA	Marion	Pan trap	45.158	-122.85
482	1.62	3.60904	0.557392	26_7_2017	111	Woodburn	Oregon	USA	Marion	Pan trap	45.158	-122.85
477	1.78	4.12776	0.615714	25_7_2017	111	Woodburn	Oregon	USA	Marion	Hand collected	45.158	-122.85
490	1.99	4.80858	0.682017	23_8_2017	111	Woodburn	Oregon	USA	Marion	Hand collected	45.158	-122.85
476	3.46	9.57432	0.981108	20_6_2017	111	Woodburn	Oregon	USA	Marion	Hand collected	45.158	-122.85	Apis mellifera
488	3.48	9.63916	0.984039	25_7_2017	111	Woodburn	Oregon	USA	Marion	Hand collected	45.158	-122.85
478	3.59	9.99578	0.999817	26_7_2017	111	Woodburn	Oregon	USA	Marion	Pan trap	45.158	-122.85	Apis mellifera
483	3.59	9.99578	0.999817	21_6_2017	111	Woodburn	Oregon	USA	Marion	Pan trap	45.158	-122.85	Apis mellifera
481	3.65	10.1903	1.00819	26_7_2017	111	Woodburn	Oregon	USA	Marion	Pan trap	45.158	-122.85	Apis mellifera
485	3.72	10.4172	1.01775	23_8_2017	111	Woodburn	Oregon	USA	Marion	Hand collected	45.158	-122.85	Apis mellifera
479	3.75	10.5145	1.02179	25_7_2017	111	Woodburn	Oregon	USA	Marion	Hand collected	45.158	-122.85	Apis mellifera
487	3.82	10.7414	1.03106	25_7_2017	111	Woodburn	Oregon	USA	Marion	Hand collected	45.158	-122.85	Apis mellifera
484	3.97	11.2277	1.05029	23_8_2017	111	Woodburn	Oregon	USA	Marion	Hand collected	45.158	-122.85	Bombus sp.
489	4.39	12.5894	1.1	23_8_2017	111	Woodburn	Oregon	USA	Marion	Hand collected	45.158	-122.85
486	4.51	12.9784	1.11322	23_8_2017	111	Woodburn	Oregon	USA	Marion	Hand collected	45.158	-122.85	Bombus sp.
